# Supplementary material for: Hexamethyldisilazane-assisted Mn2+ doping of perovskite nanocrystals under ambient conditions
Source: Royal Society of Chemistry journal article supplement (doi:10.1039/d1ce01548f), 2022-01-01
Supplement: d1ce01548f1.pdf [file d1ce01548f1.pdf]

## **Hexamethyldisilazane-assisted Mn<sup>2+</sup> doping of perovskite nanocrystals under ambient conditions**

Kaiwen Hu†<sup>a</sup>, Yongfei Hu†<sup>a</sup>, Tan Li<sup>a</sup>, Fen Qiao<sup>b</sup>, Yunxia Chen<sup>c</sup>, Jianjun Han<sup>a\*</sup>, Lee Li<sup>d</sup>, Ghafar Ali<sup>e</sup>, Yi Xie<sup>a\*</sup>

<sup>a</sup>*State Key Laboratory of Silicate Materials for Architectures, Wuhan University of Technology (WUT), No. 122, Luoshi Road, Wuhan 430070, P. R. China.*

<sup>b</sup>*School of Energy and Power Engineering, Jiangsu University, No.301, Xuefu Road, Zhenjiang 212013, P. R. China.*

<sup>c</sup>*School of Materials Science and Engineering, Jingdezhen Ceramic University, Jiangxi, P. R. China.*

<sup>d</sup>*School of Electrical and Electronic Engineering, Huazhong University of Science and Technology (HUST), Wuhan 430074, P.R. China.*

<sup>e</sup>*Nanomaterials Research Group (NRG), Physics Division, PINSTECH, Nilore, Islamabad, Pakistan.*

*Email: xiey@whut.edu.cn; [hanjj@whut.edu.cn](mailto:hanjj@whut.edu.cn)*

## 1. Characterization of the As-synthesized $\text{Mn}^{2+}$ -doped LHP Nanocrystals

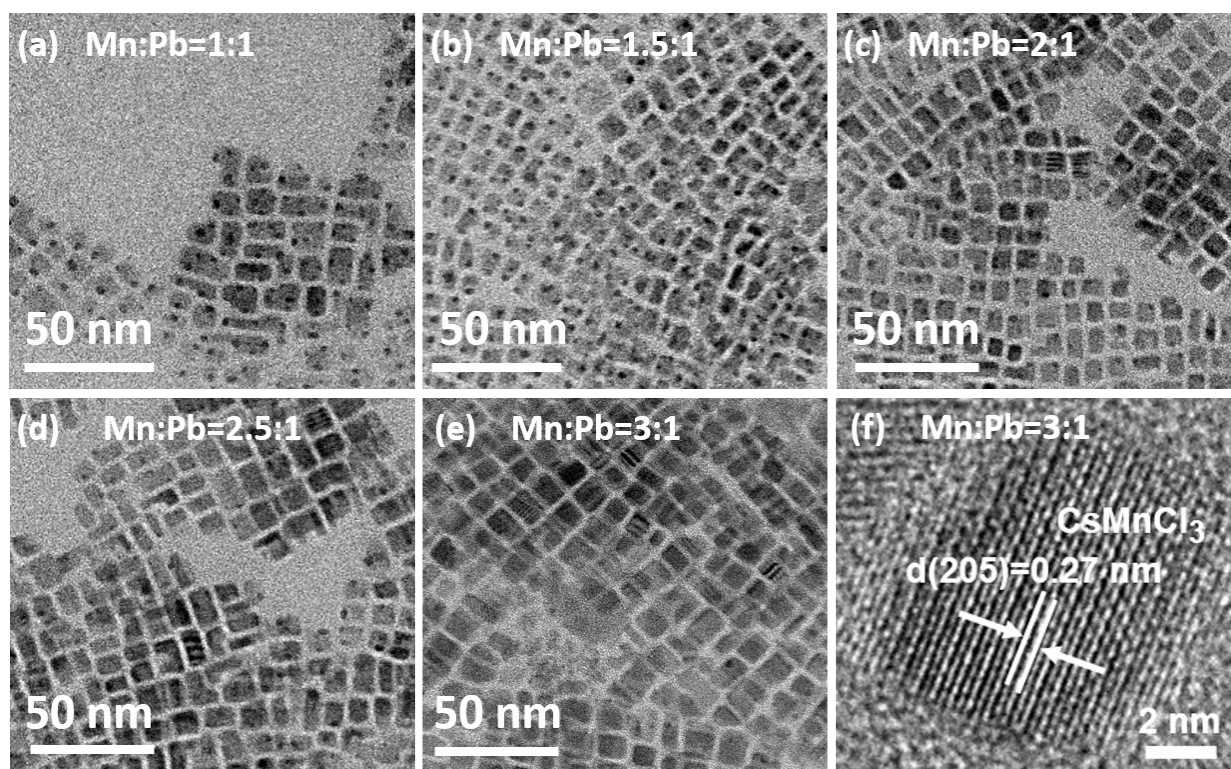

**Fig. S1** TEM images of the typical  $\text{Mn}^{2+}$ -doped  $\text{CsPbCl}_3$  NCs achieved in the presence of different amounts of Mn as dictated.

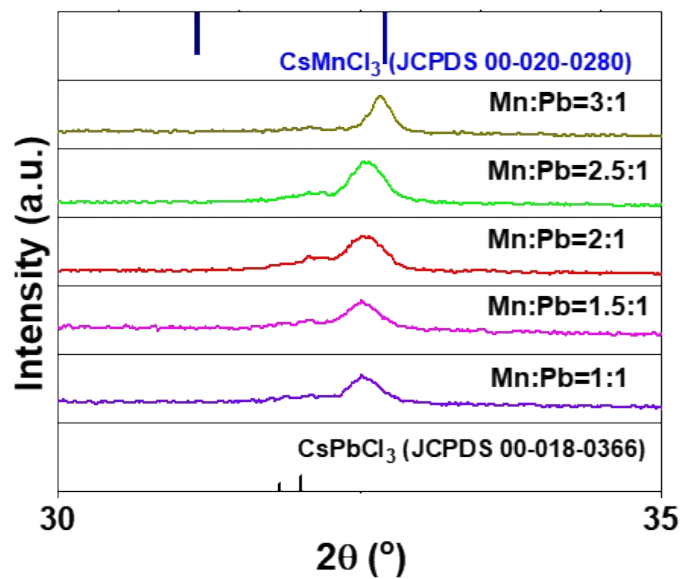

**Fig. S2** XRD patterns of Mn<sup>2+</sup>-doped CsPbCl<sub>3</sub> nanocrystals synthesized in the presence of different amounts of Mn<sup>2+</sup> ions in the precursors (labelled as Mn:Pb).

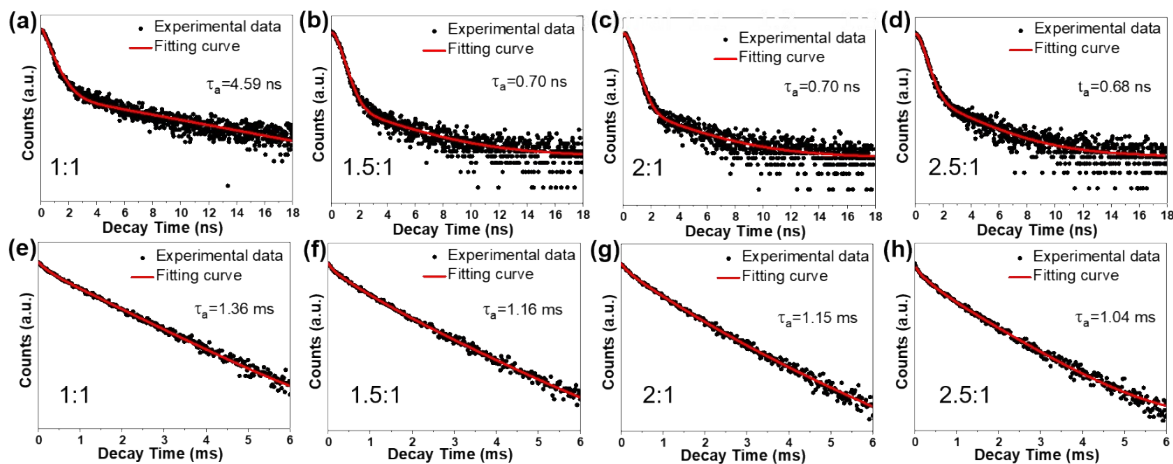

**Fig. S3** Time-resolved PL decays and fitting curves of the various  $\text{Mn}^{2+}$ -doped  $\text{CsPbCl}_3$  nanocrystals monitored at 400 nm (a-d) and 600 nm (e-h), respectively. The samples are synthesized in the presence of different feed Mn:Pb ratios as dictated in each panel.

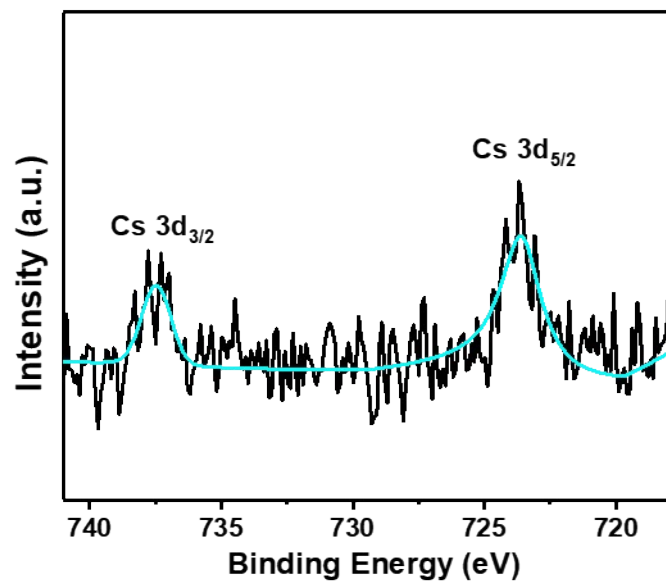

**Fig. S4** High-resolution XPS spectrum of Cs 3d of the representative Mn<sup>2+</sup>-doped CsPbCl<sub>3</sub> nanocrystals.

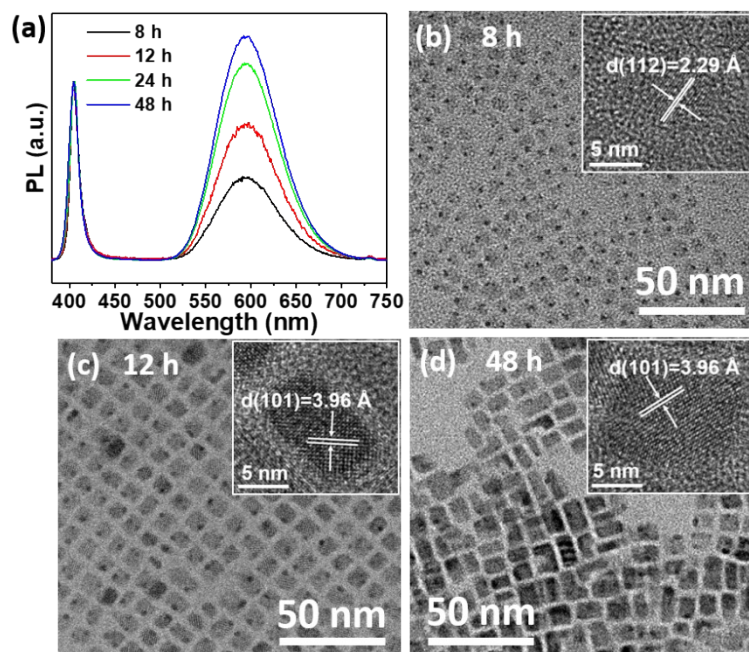

**Fig. S5** Experimental PL emission spectra (a) and TEM images (b-d) of the aliquots of the  $\text{Mn}^{2+}$ -doped  $\text{CsPbCl}_3$  nanocrystals collected at different reaction time. The samples are synthesized in the presence of Mn:Pb precursor ratio of 2.5:1 and HMDS of 6 mL.

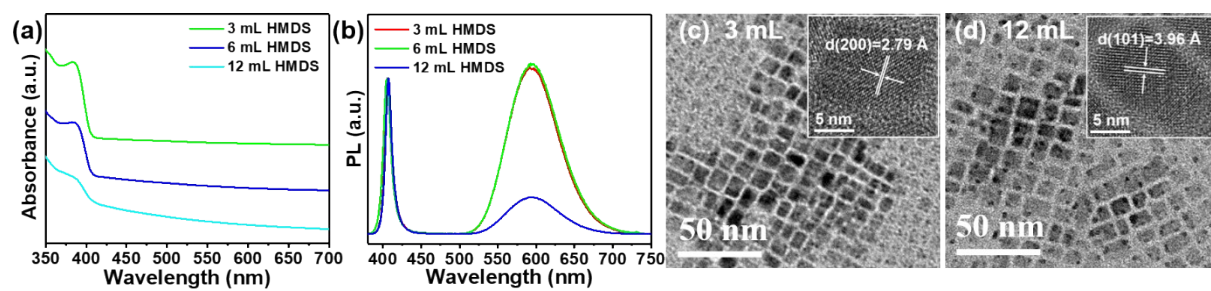

**Fig. S6** (a-b) Optical absorbance spectra (a) and PL emissions spectra (b), and (c-d) TEM images of the typical  $\text{Mn}^{2+}$ -doped  $\text{CsPbCl}_3$  NCs achieved in the presence of different amounts of HMDS as dictated.

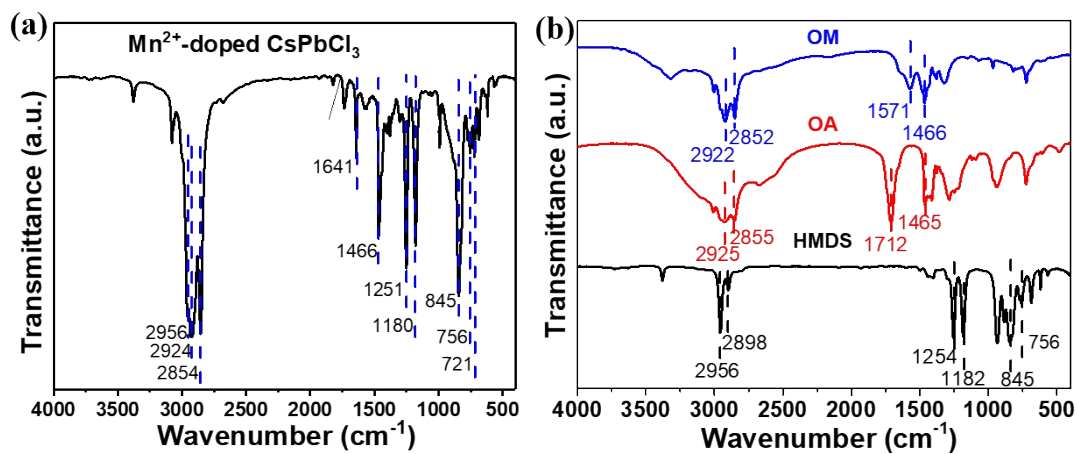

**Fig. S7** FTIR spectra of the representative Mn<sup>2+</sup>-doped CsPbCl<sub>3</sub> nanocrystals (a) and the pure oleylamine (OM), oleic acid (OA) and hexamethyl disilazane (HMDS) as dictated (b), respectively.



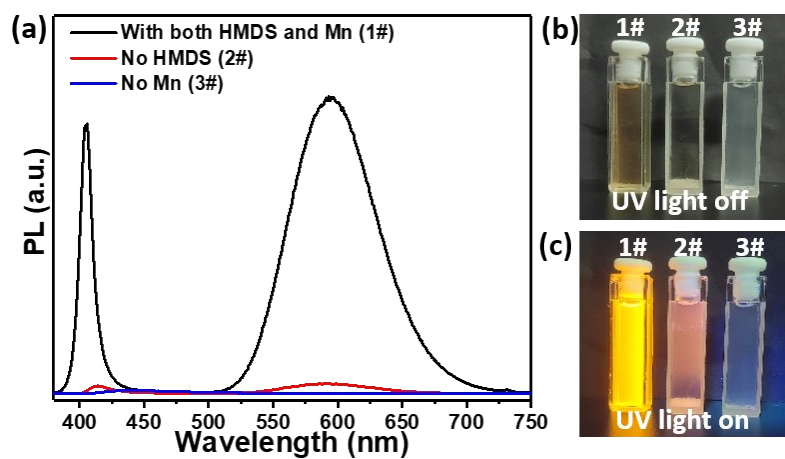

**Fig. S8** Experimental PL emission spectra of typical products collected in the presence of both  $\text{Mn}^{2+}$  and HMDS, no HMDS and no  $\text{Mn}^{2+}$  ions, respectively (a), and digital photographs of the corresponding dispersions under UV light off (b) and on (c), respectively.

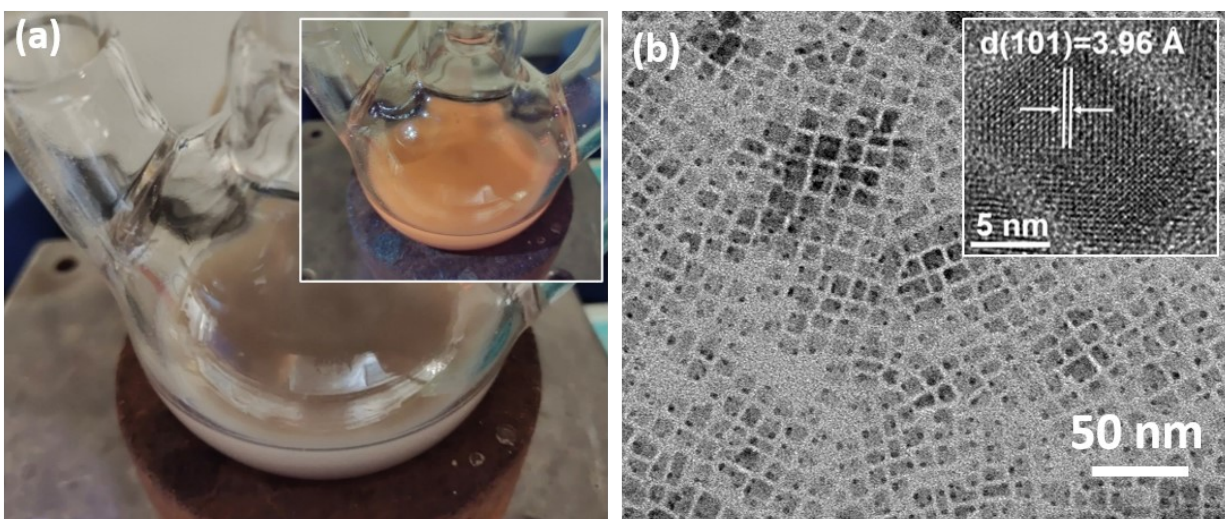

**Fig. S9** (a) Digital photograph of Mn<sup>2+</sup>-doped CsPbCl<sub>3</sub> dispersion under normal indoor light and UV illumination (inset), and (b) TEM image and HRTEM image (inset) of the large-scaled synthesized Mn<sup>2+</sup>-doped CsPbCl<sub>3</sub> nanocrystals. The lattice spacing of 0.39 nm marked in HRTEM image displays the (101) crystal plane of tetragonal phase of CsPbCl<sub>3</sub>.

**Table S1** *The summarization on the optical characterization of the Mn<sup>2+</sup>-doped CsPbCl<sub>3</sub> nanocrystals achieved in the presence of different Mn:Pb precursor ratios.*

| Mn:Pb | PL peak positions (nm) | Mn:(Mn+Pb) in the final NCs (%) <sup>a</sup> | PLQY (%) | Lifetimes monitored at 400 nm (ns) | Lifetimes monitored at 600 nm (ms) |
|-------|------------------------|----------------------------------------------|----------|------------------------------------|------------------------------------|
| 1:1   | 406/591                | 33                                           | 18.3     | 4.59                               | 1.36                               |
| 1.5:1 | 406/592                | 39                                           | 18.6     | 0.70                               | 1.16                               |
| 2:1   | 406/592                | 43                                           | 18.9     | 0.70                               | 1.15                               |
| 2.5:1 | 406/593                | 51                                           | 39.6     | 0.68                               | 1.04                               |

<sup>a</sup> Analyzed by using Inductively coupled plasma-optical emission spectroscopy (ICP-OES) test.

**Table S2** The summarization on the optical characterization of the  $Mn^{2+}$ -doped  $CsPbBr_xCl_{3-x}$  nanocrystals achieved in the presence of different Br:Cl precursor ratios.

| Br:Cl | Absorption peak<br>(nm) | PL Peak (nm) | FWHM (nm) | Relative intensity<br>(peak2/peak1) |
|-------|-------------------------|--------------|-----------|-------------------------------------|
| 0:1   | 384                     | 406/594      | 5/38      | 1.1                                 |
| 1:1   | 419                     | 425/593      | 10/39     | 0.45                                |
| 2:1   | 431                     | 440/591      | 14/55     | 0.3                                 |
| 3:1   | 442                     | 462/         | 15/-      | 0                                   |

## 2. Characterization of Anion-exchanged Mn-doped LHP Nanocrystals

**Preparation of PbBr<sub>2</sub> and PbI<sub>2</sub> Stock Solution for Anion Exchange.** Typically, 69 mg (i.e., 0.188 mmol) of PbBr<sub>2</sub>, 10 ml of ODE, 1 ml of OM and 0.5 ml of OA were loaded into a 50 mL three-neck flask. The temperature was then raised to 100 °C under vacuum and kept stirring for 60 min. The system was then filled with Ar gas and the reaction was continued at 120°C for additional 60 min. The resulting PbBr<sub>2</sub> stock solution was cooled to room temperature, transferred to a vial and stored in the glove box for subsequent anion exchange. The preparation process for the PbI<sub>2</sub> stock solution was the same as above except that PbI<sub>2</sub> (87 mg) instead of PbBr<sub>2</sub> was used.

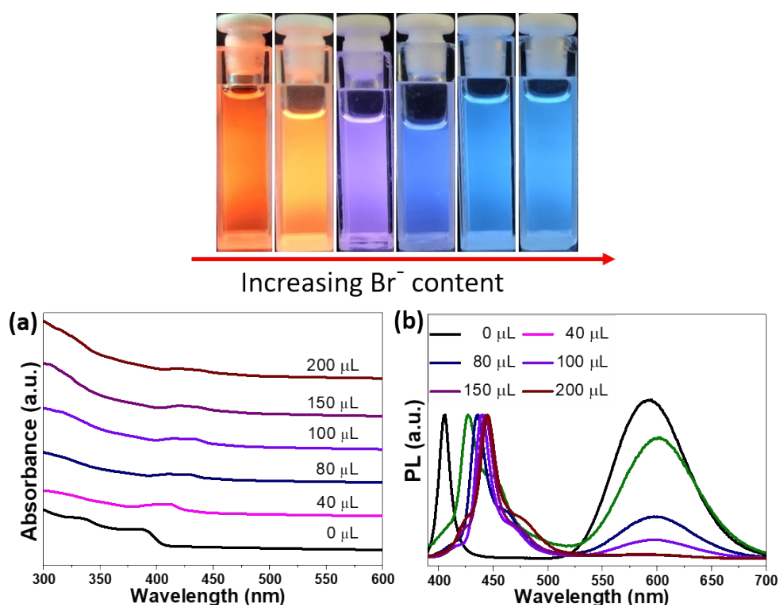

**Fig. S10** (a) Optical absorbance spectra and (b) PL spectra of the various Mn-doped CsPbBr<sub>x</sub>Cl<sub>3-x</sub> nanocrystals achieved by anion exchange of the as-synthesized Mn-doped CsPbCl<sub>3</sub> in the presence of different amounts of Br<sup>-</sup> ions as dictated. The top panel presents the digital photographs of corresponding nanocrystals dispersed in hexane under UV light illumination (365 nm excitation wavelength).

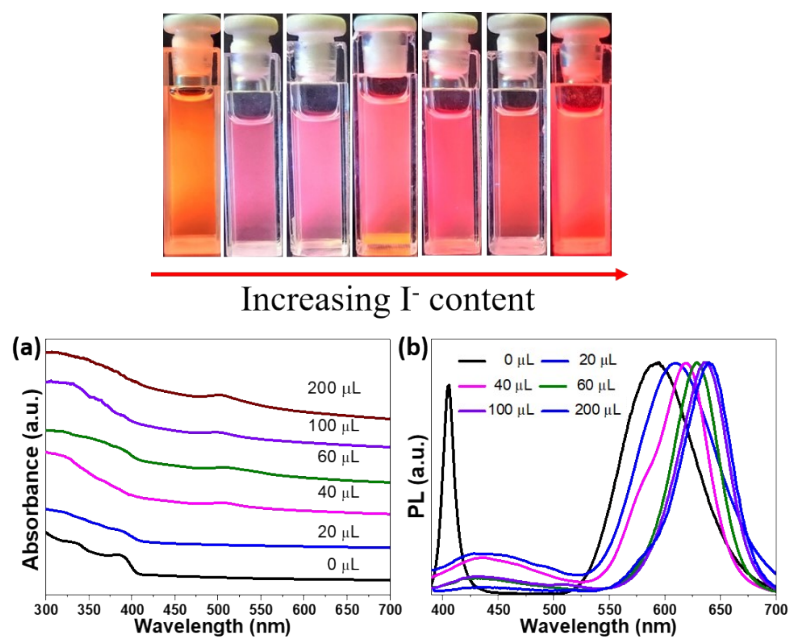

**Fig. S11** (a) Optical absorbance spectra and (b) PL spectra of the various Mn-doped  $\text{CsPbI}_x\text{Cl}_{3-x}$  nanocrystals achieved by anion exchange of the as-synthesized Mn-doped  $\text{CsPbCl}_3$  in the presence of different amounts of  $\text{I}^-$  ions as dictated. The top panel presents the digital photographs of corresponding nanocrystals dispersed in hexane under UV light illumination (365 nm excitation wavelength).
